# Supplementary material for: Measurement Repeatability of 18F-FDG PET/CT Versus 18F-FDG PET/MRI in Solid Tumors of the Pelvis
Source: PubMed Central journal article supplement (PMC6681694; doi:10.2967/jnumed.118.218735), 2019-08
Supplement: jnm218735SupplementalData.pdf [file jnm218735SupplementalData.pdf]

Supplemental Table 1. DWI acquisition parameters.

| Parameter                      | Value                           |
|--------------------------------|---------------------------------|
| Time to repetition (TR)        | 5300 ms                         |
| Time to echo (TE)              | 81 ms                           |
| Averages                       | 3                               |
| Field of view                  | 330 mm x 248 mm                 |
| Voxel dimensions (in-plane)    | 2.6 mm x 2.6 mm                 |
| Slice thickness                | 5 mm                            |
| B-values                       | 50, 500, 1000 s/mm <sup>2</sup> |
| Diffusion directions           | 3                               |
| Fat suppression                | SPAIR                           |
| Parallel acquisition technique | GRAPPA                          |
| Acceleration factor            | 2                               |

Abbreviations: GRAPPA – generalized autocalibrating partial parallel acquisition;  
SPAIR – spectral attenuated inversion recovery

Supplemental Table 2. PET reconstruction parameters.

| Parameter      | OSEM          |               | PSF           |               |
|----------------|---------------|---------------|---------------|---------------|
|                | PET/CT        | PET/MRI       | PET/CT        | PET/MRI       |
| Dimensionality | 2D            | 3D            | 3D            | 3D            |
| Iterations     | 4             | 3             | 2             | 3             |
| Subsets        | 8             | 21            | 21            | 21            |
| Matrix         | 168 x 168     | 172 x 172     | 168 x 168     | 172 x 172     |
| Zoom           | 1             | 1             | 1             | 1             |
| Filter         | 5 mm Gaussian | 7 mm Gaussian | 2 mm Gaussian | 3 mm Gaussian |

Note: For the OSEM reconstructions, parameters were selected to achieve identical recovery coefficients for PET/CT and PET/MRI. Similarly, for the PSF reconstructions, manufacturer-provided resolution recovery parameters were first applied, and then the filters were adjusted to achieve identical recovery coefficients for PET/CT and PET/MRI. Time-of-flight imaging was not available for either scanner used in this study.

Abbreviations: OSEM – ordered-subset expectation maximization; PSF – point-spread function

Supplemental Table 3. Mean values of SUV<sub>max</sub> and SUL<sub>peak</sub> from OSEM and PSF reconstructions for PET/CT and PET/MRI.

| Reconstruction | Metric              | 1 min      |            |          | 3 min      |            |          | 5 min      |            |          |
|----------------|---------------------|------------|------------|----------|------------|------------|----------|------------|------------|----------|
|                |                     | PET/CT     | PET/MRI    | <i>p</i> | PET/CT     | PET/MRI    | <i>p</i> | PET/CT     | PET/MRI    | <i>p</i> |
| OSEM           | SUV <sub>max</sub>  | 18.7 ± 5.6 | 16.3 ± 5.5 | 0.006*   | 18.3 ± 5.4 | 15.7 ± 5.3 | 0.006*   | 18.2 ± 5.6 | 16.4 ± 5.8 | 0.02     |
| PSF            | SUV <sub>max</sub>  | 24.0 ± 8.0 | 23.6 ± 6.5 | 0.83     | 23.2 ± 7.6 | 22.8 ± 6.4 | 0.472    | 22.7 ± 7.7 | 22.0 ± 6.2 | 0.12     |
| OSEM           | SUL <sub>peak</sub> | 9.3 ± 2.5  | 8.2 ± 2.3  | 0.001*   | 9.3 ± 2.5  | 8.1 ± 2.2  | 0.001*   | 9.2 ± 2.5  | 8.4 ± 2.4  | 0.001*   |
| PSF            | SUL <sub>peak</sub> | 10.5 ± 2.8 | 9.3 ± 2.2  | 0.001*   | 10.3 ± 2.6 | 9.8 ± 2.5  | 0.036    | 10.3 ± 2.7 | 9.5 ± 2.4  | 0.003*   |

Note: All data are based on whole tumor contours. Numbers provided are means ± standard deviations across all patients and reflect values obtained for both imaging sessions averaged on a per-patient basis. The *p* values are based on results of the Wilcoxon signed-rank test.

Abbreviations: OSEM – ordered-subset expectation maximization; PSF – point spread function; SUL – lean body mass-adjusted standardized uptake value

\* Significant *p* value, based on results of the Wilcoxon signed-rank test.

Supplemental Table 4. Mean values of exploratory <sup>18</sup>F-FDG-PET metrics from OSEM and PSF reconstructions for PET/CT and PET/MRI.

| Reconstruction | Contour | Metric              | 1 min       |             |          | 3 min       |             |          | 5 min       |             |          |
|----------------|---------|---------------------|-------------|-------------|----------|-------------|-------------|----------|-------------|-------------|----------|
|                |         |                     | PET/CT      | PET/MRI     | <i>p</i> | PET/CT      | PET/MRI     | <i>p</i> | PET/CT      | PET/MRI     | <i>p</i> |
| OSEM           | WT      | SUV <sub>mean</sub> | 7.8 ± 2.4   | 7.3 ± 2.2   | 0.05     | 7.9 ± 2.3   | 7.1 ± 2.1   | 0.03     | 7.9 ± 2.3   | 7.5 ± 2.3   | 0.08     |
| PSF            | WT      | SUV <sub>mean</sub> | 8.0 ± 2.3   | 7.3 ± 1.8   | 0.16     | 8.1 ± 2.3   | 8.0 ± 2.3   | 0.64     | 8.0 ± 2.3   | 7.8 ± 2.2   | 0.25     |
| OSEM           | WT      | SUV <sub>peak</sub> | 14.8 ± 4.7  | 13.1 ± 4.2  | 0.001*   | 14.8 ± 4.7  | 12.9 ± 4.1  | 0.001*   | 14.8 ± 4.7  | 13.5 ± 4.4  | 0.001*   |
| PSF            | WT      | SUV <sub>peak</sub> | 16.4 ± 5.0  | 14.9 ± 4.2  | 0.01     | 16.1 ± 4.3  | 15.6 ± 4.8  | 0.16     | 16.4 ± 5.2  | 15.3 ± 4.6  | 0.004*   |
| OSEM           | WT      | SUV <sub>TLG</sub>  | 611 ± 769   | 575 ± 778   | 0.25     | 616 ± 771   | 558 ± 730   | 0.03     | 615 ± 770   | 596 ± 790   | 0.33     |
| PSF            | WT      | SUV <sub>TLG</sub>  | 608 ± 759   | 538 ± 676   | 0.05     | 616 ± 757   | 615 ± 805   | 0.87     | 614 ± 755   | 595 ± 758   | 0.51     |
| OSEM           | WT      | SUL <sub>max</sub>  | 11.7 ± 2.9  | 10.2 ± 3.1  | 0.01     | 11.5 ± 2.8  | 9.8 ± 3.0   | 0.006*   | 11.4 ± 2.9  | 10.2 ± 3.3  | 0.02     |
| PSF            | WT      | SUL <sub>max</sub>  | 15.3 ± 4.2  | 14.7 ± 3.3  | 0.27     | 14.5 ± 4.0  | 14.2 ± 3.4  | 0.27     | 14.2 ± 4.0  | 13.7 ± 3.2  | 0.18     |
| OSEM           | WT      | SUL <sub>mean</sub> | 4.9 ± 1.4   | 4.5 ± 1.2   | 0.03     | 5.0 ± 1.3   | 4.5 ± 1.1   | 0.006*   | 5.0 ± 1.3   | 4.7 ± 1.3   | 0.04     |
| PSF            | WT      | SUL <sub>mean</sub> | 5.1 ± 1.3   | 4.5 ± 1.0   | 0.04     | 5.1 ± 1.3   | 5.0 ± 1.3   | 0.47     | 5.1 ± 1.3   | 4.9 ± 1.2   | 0.20     |
| OSEM           | WT      | SUL <sub>TLG</sub>  | 386 ± 493   | 361 ± 497   | 0.10     | 389 ± 495   | 350 ± 466   | 0.01     | 388 ± 494   | 374 ± 506   | 0.36     |
| PSF            | WT      | SUL <sub>TLG</sub>  | 391 ± 487   | 338 ± 431   | 0.01     | 388 ± 485   | 386 ± 515   | 0.73     | 387 ± 484   | 371 ± 483   | 0.20     |
| OSEM           | WT      | MTV (ml)            | 67.8 ± 74.6 | 68.7 ± 77.2 | 0.33     | 67.8 ± 74.6 | 68.7 ± 77.2 | 0.33     | 67.8 ± 74.6 | 68.7 ± 77.2 | 0.33     |
| PSF            | WT      | MTV (ml)            | 67.8 ± 74.6 | 68.7 ± 77.2 | 0.33     | 67.8 ± 74.6 | 68.7 ± 77.2 | 0.33     | 67.8 ± 74.6 | 68.7 ± 77.2 | 0.33     |
| OSEM           | 40%     | SUV <sub>mean</sub> | 11.0 ± 3.4  | 9.7 ± 3.1   | 0.002*   | 10.9 ± 3.3  | 9.4 ± 3.0   | 0.001*   | 10.8 ± 3.4  | 9.8 ± 3.2   | 0.02     |
| PSF            | 40%     | SUV <sub>mean</sub> | 13.4 ± 4.3  | 13.0 ± 3.6  | 0.25     | 13.1 ± 4.3  | 13.0 ± 3.9  | 0.60     | 12.9 ± 4.3  | 12.6 ± 3.8  | 0.22     |
| OSEM           | 40%     | SUV <sub>TLG</sub>  | 436 ± 602   | 409 ± 546   | 0.78     | 463 ± 640   | 399 ± 495   | 0.18     | 468 ± 643   | 430 ± 537   | 0.10     |
| PSF            | 40%     | SUV <sub>TLG</sub>  | 351 ± 504   | 266 ± 338   | 0.04     | 389 ± 546   | 387 ± 609   | 0.87     | 390 ± 564   | 390 ± 569   | 0.93     |
| OSEM           | 40%     | SUL <sub>mean</sub> | 6.9 ± 1.7   | 6.0 ± 1.7   | 0.002*   | 6.9 ± 1.7   | 5.9 ± 1.6   | 0.001*   | 6.8 ± 1.7   | 6.1 ± 1.7   | 0.004*   |
| PSF            | 40%     | SUL <sub>mean</sub> | 8.6 ± 2.2   | 8.1 ± 1.8   | 0.04     | 8.2 ± 2.2   | 8.1 ± 2.0   | 0.36     | 8.1 ± 2.2   | 7.8 ± 2.0   | 0.12     |
| OSEM           | 40%     | SUL <sub>TLG</sub>  | 277 ± 387   | 257 ± 348   | 0.73     | 294 ± 412   | 251 ± 317   | 0.04     | 295 ± 413   | 271 ± 345   | 0.08     |
| PSF            | 40%     | SUL <sub>TLG</sub>  | 226 ± 323   | 168 ± 216   | 0.004*   | 247 ± 350   | 247 ± 391   | 0.98     | 248 ± 361   | 245 ± 364   | 0.60     |
| OSEM           | 40%     | MTV (ml)            | 36.1 ± 46.8 | 37.6 ± 43.6 | 0.08     | 39.4 ± 51.5 | 38.3 ± 42.9 | 0.08     | 39.9 ± 52.2 | 39.4 ± 44.2 | 0.08     |
| PSF            | 40%     | MTV (ml)            | 25.7 ± 36.2 | 19.9 ± 24.8 | 0.01     | 29.6 ± 41.2 | 29.0 ± 44.2 | 0.98     | 29.9 ± 43.1 | 30.4 ± 44.0 | 0.83     |

Note: Numbers provided are means ± standard deviations across all patients and reflect values obtained for both imaging sessions averaged on a per-patient basis. SUV<sub>peak</sub> and SUL<sub>max</sub> were calculated only for the WT contour, as some of the 40% isocontours were not large enough for calculation of a peak value and because maximum values for the WT contour and the 40% isocontour are identical.

Abbreviations: 40% –40% isocontour; MTV – metabolic tumor volume; OSEM – ordered-subset expectation maximization; PSF – point spread function; SUL – lean body mass-adjusted standardized uptake value; TLG – total lesion glycolysis; WT –whole tumor contour

\* Significant *p* value, based on results of the Wilcoxon signed-rank test.

Supplemental Table 5. Mean values of ADC<sub>median</sub> from PET/MRI.

| Metric                                     | Session 1 | Session 2 | <i>p</i> |
|--------------------------------------------|-----------|-----------|----------|
| ADC <sub>median</sub> (mm/s <sup>2</sup> ) | 904 ± 104 | 904 ± 113 | 0.76     |

Note: Numbers provided in the session 1 and session 2 columns are means ± standard deviations across all patients. For the majority of patients, two usable DWI acquisitions were available for each imaging session. For these patients, the two data points from a given session were averaged to obtain a single value per imaging session. The *p* values are based on results of the Wilcoxon signed-rank test.

Abbreviations: ADC – apparent diffusion coefficient

Supplemental Table 6. Mean values of exploratory ADC metrics from PET/MRI.

| Metric                                     | Session 1   | Session 2   | <i>p</i> |
|--------------------------------------------|-------------|-------------|----------|
| ADC <sub>mean</sub> (mm/s <sup>2</sup> )   | 942 ± 92    | 933 ± 101   | 0.64     |
| ADC <sub>20</sub> (mm/s <sup>2</sup> )     | 708 ± 79    | 704 ± 75    | 0.81     |
| ADC <sub>trough</sub> (mm/s <sup>2</sup> ) | 750 ± 106   | 753 ± 115   | 0.39     |
| DTV (ml)                                   | 64.7 ± 80.5 | 62.7 ± 77.5 | 0.64     |

Note: Numbers provided in the session 1 and session 2 columns are means ± standard deviations across all patients. For the majority of patients, two usable DWI acquisitions were available for each imaging session. For these patients, the two data points from a given session were averaged to obtain a single value per imaging session. The *p* values are based on results of the Wilcoxon signed-rank test.

Abbreviations: ADC – apparent diffusion coefficient; ADC<sub>20</sub> – mean value obtained from the intra-lesion voxels with the lowest 20% of ADC values; ADC<sub>trough</sub> – lowest mean ADC value obtainable for a 1 cm<sup>3</sup> sphere placed within the confines of the lesion (analogous to the inverse of *peak* for PET imaging) ; DTV – diffusional tumor volume

Supplemental Table 7. Repeatability results for SUV<sub>max</sub> and SUL<sub>peak</sub> from OSEM and PSF reconstructions for PET/CT and PET/MRI.

| Reconstruction | Metric              | 1 min   |       |         |       | 3 min   |       |         |        | 5 min   |       |         |       |
|----------------|---------------------|---------|-------|---------|-------|---------|-------|---------|--------|---------|-------|---------|-------|
|                |                     | PET/CT  |       | PET/MRI |       | PET/CT  |       | PET/MRI |        | PET/CT  |       | PET/MRI |       |
|                |                     | Mean %Δ | wCV   | Mean %Δ | wCV   | Mean %Δ | wCV   | Mean %Δ | wCV    | Mean %Δ | wCV   | Mean %Δ | wCV   |
| OSEM           | SUV <sub>max</sub>  | -2.2%   | 8.5%  | -5.3%   | 7.9%  | -1.7%   | 9.6%  | -4.7%   | 6.7%*  | -1.6%   | 9.7%  | -5.2%   | 8.0%  |
| PSF            | SUV <sub>max</sub>  | 0.9%    | 12.8% | -2.3%   | 8.7%  | 2.6%    | 11.7% | -1.8%   | 6.6%   | -0.8%   | 8.8%  | -3.7%   | 7.7%  |
| OSEM           | SUL <sub>peak</sub> | -0.6%   | 9.9%  | -4.6%   | 10.4% | 0.6%    | 10.5% | -4.7%   | 9.2%*  | -0.2%   | 10.7% | -5.1%   | 9.7%* |
| PSF            | SUL <sub>peak</sub> | 2.3%    | 11.2% | -3.7%   | 11.3% | 2.3%    | 11.5% | -6.0%   | 10.0%* | 0.5%    | 10.4% | -5.5%   | 9.5%* |

Note: All data are based on whole tumor contours.

Abbreviations: %Δ – percent change between sessions; OSEM – ordered-subset expectation maximization; PSF – point-spread function; wCV – within-subject coefficient of variation; SUL – lean body mass-adjusted standardized uptake value

\* Distribution of values for mean %Δ was non-normal.

Supplemental Table 8. Repeatability results for exploratory <sup>18</sup>F-FDG-PET parameters from OSEM and PSF reconstructions for PET/CT and PET/MRI.

| Reconstruction | Contour | Metric              | 1 min   |       |         |        | 3 min   |       |         |        | 5 min   |       |         |       |
|----------------|---------|---------------------|---------|-------|---------|--------|---------|-------|---------|--------|---------|-------|---------|-------|
|                |         |                     | PET/CT  |       | PET/MRI |        | PET/CT  |       | PET/MRI |        | PET/CT  |       | PET/MRI |       |
|                |         |                     | Mean %Δ | wCV   | Mean %Δ | wCV    | Mean %Δ | wCV   | Mean %Δ | wCV    | Mean %Δ | wCV   | Mean %Δ | wCV   |
| OSEM           | WT      | SUV <sub>mean</sub> | 2.1%    | 12.2% | -4.2%   | 11.1%  | 3.0%    | 13.1% | -4.1%   | 10.9%  | 2.2%    | 12.9% | -4.6%   | 10.9% |
| PSF            | WT      | SUV <sub>mean</sub> | 0.1%    | 13.7% | -2.1%   | 14.4%  | 4.4%    | 14.5% | -4.8%   | 11.9%  | 2.3%    | 13.4% | -4.1%   | 11.6% |
| OSEM           | WT      | SUV <sub>peak</sub> | -0.5%   | 9.6%  | -5.8%   | 10.1%  | 0.7%    | 10.3% | -4.5%   | 8.6%*  | 0.7%    | 10.7% | -5.0%   | 9.4%* |
| PSF            | WT      | SUV <sub>peak</sub> | -1.2%   | 11.2% | -3.6%   | 11.0%  | -0.8%   | 14.5% | -5.9%   | 9.8%*  | 0.5%    | 10.1% | -5.4%   | 9.3%* |
| OSEM           | WT      | SUV <sub>TLG</sub>  | -4.2%   | 13.8% | -0.4%   | 10.5%  | -3.3%   | 13.6% | -0.3%   | 10.2%  | -4.0%   | 13.9% | -0.8%   | 10.4% |
| PSF            | WT      | SUV <sub>TLG</sub>  | -6.1%   | 13.9% | 1.8%    | 12.7%  | -1.9%   | 13.6% | -0.9%   | 10.2%  | -4.0%   | 13.5% | -0.3%   | 9.6%  |
| OSEM           | WT      | SUL <sub>max</sub>  | -2.3%   | 8.8%  | -5.4%   | 8.2%   | -1.8%   | 9.8%  | -4.8%   | 7.0%*  | -1.9%   | 10.0% | -5.3%   | 8.4%* |
| PSF            | WT      | SUL <sub>max</sub>  | 4.3%    | 13.0% | -2.4%   | 8.9%   | 2.8%    | 11.8% | -1.9%   | 6.9%   | -0.9%   | 9.1%  | -3.8%   | 7.9%  |
| OSEM           | WT      | SUL <sub>mean</sub> | 2.0%    | 12.5% | -4.2%   | 11.4%  | 2.9%    | 13.3% | -4.1%   | 11.1%  | 2.2%    | 13.2% | -4.7%   | 11.2% |
| PSF            | WT      | SUL <sub>mean</sub> | 3.5%    | 13.3% | -2.1%   | 14.6%  | 4.3%    | 14.7% | -4.8%   | 12.2%  | 2.2%    | 13.6% | -4.1%   | 11.9% |
| OSEM           | WT      | SUL <sub>TLG</sub>  | -4.2%   | 13.9% | -0.5%   | 10.8%  | -3.4%   | 13.7% | -0.3%   | 10.6%  | -4.1%   | 14.0% | -0.8%   | 10.7% |
| PSF            | WT      | SUL <sub>TLG</sub>  | -2.7%   | 14.0% | 1.7%    | 12.9%  | -1.7%   | 13.6% | -1.0%   | 10.5%  | -4.1%   | 13.6% | 0.3%    | 9.3%  |
| OSEM           | WT      | MTV (ml)            | -6.2%   | 13.8% | 3.8%    | 9.1%*  | -6.2%   | 13.8% | 3.8%    | 9.1%*  | -6.2%   | 13.8% | 3.8%    | 9.1%* |
| PSF            | WT      | MTV (ml)            | -6.2%   | 13.8% | 3.8%    | 9.1%*  | -6.2%   | 13.8% | 3.8%    | 9.1%*  | -6.2%   | 13.8% | 3.8%    | 9.1%* |
| OSEM           | 40%     | SUV <sub>mean</sub> | -1.3%   | 8.2%  | -5.4%   | 7.9%   | -1.5%   | 9.6%  | -5.4%   | 7.6%*  | 0.0%    | 10.4% | -5.2%   | 7.9%* |
| PSF            | 40%     | SUV <sub>mean</sub> | -0.7%   | 12.0% | -3.2%   | 8.3%   | 1.8%    | 10.5% | -4.4%   | 7.2%   | -0.3%   | 9.1%  | -5.4%   | 8.2%  |
| OSEM           | 40%     | SUV <sub>TLG</sub>  | -0.8%   | 16.3% | 0.7%    | 15.0%  | 0.4%    | 13.7% | 0.9%    | 14.1%  | -2.5%   | 15.2% | 0.7%    | 13.5% |
| PSF            | 40%     | SUV <sub>TLG</sub>  | -9.8%   | 17.9% | -1.5%   | 22.2%  | -0.7%   | 14.7% | -2.9%   | 18.5%  | -4.5%   | 15.4% | 0.5%    | 16.3% |
| OSEM           | 40%     | SUL <sub>mean</sub> | -1.4%   | 8.5%  | -5.5%   | 8.2%   | -1.6%   | 10.0% | -5.2%   | 7.4%*  | -2.3%   | 9.8%  | -5.3%   | 8.2%* |
| PSF            | 40%     | SUL <sub>mean</sub> | 2.7%    | 11.8% | -3.3%   | 8.5%   | 1.7%    | 10.7% | -4.2%   | 7.7%   | -0.4%   | 9.3%  | -5.5%   | 8.5%  |
| OSEM           | 40%     | SUL <sub>TLG</sub>  | -0.9%   | 16.6% | 0.6%    | 15.3%  | 0.4%    | 13.9% | 0.8%    | 14.4%  | -0.6%   | 14.1% | 0.6%    | 13.8% |
| PSF            | 40%     | SUL <sub>TLG</sub>  | -6.4%   | 16.5% | -1.5%   | 22.4%  | -0.8%   | 14.9% | -5.1%   | 18.9%  | -4.6%   | 15.6% | 0.4%    | 16.6% |
| OSEM           | 40%     | MTV (ml)            | 0.5%    | 11.9% | 6.0%    | 14.3%* | 1.9%    | 8.3%  | 6.0%    | 11.7%* | 1.7%    | 9.1%  | 5.9%    | 10.6% |
| PSF            | 40%     | MTV (ml)            | -9.2%   | 15.2% | 1.5%    | 23.0%  | -2.6%   | 10.2% | -1.2%   | 17.1%  | -4.2%   | 10.9% | 5.8%    | 16.3% |

Note: SUV<sub>peak</sub> and SUL<sub>max</sub> were calculated only for the WT contour, as some of the 40% isocontours were not large enough for calculation of a peak value and because maximum values for the WT contour and the 40% isocontour are identical.

Abbreviations: 40% –40% isocontour; % Δ – percent change; <sup>18</sup>F-FDG – 2-<sup>18</sup>F-fluoro-2-deoxy-D-glucose; MTV – metabolic tumor volume; OSEM – ordered-subset expectation maximization; PET – positron emission tomography; PSF – point-spread function; TLG – total lesion glycolysis; wCV – within-subject coefficient of variation; WT – whole tumor contour

\*Distribution of values for mean %Δ was non-normal



Supplemental Table 9. Repeatability results for ADC<sub>median</sub> from PET/MRI.

|                       | Mean<br>%Δ | wCV  |
|-----------------------|------------|------|
| ADC <sub>median</sub> | 0.5%       | 3.5% |

Note: For patients with more than one usable set of ADC data for a given session (as two DWI acquisitions were performed per session), one set was selected at random from each session for this analysis.

Abbreviations: %Δ – percent change between sessions; ADC – apparent diffusion coefficient; wCV – within-subject coefficient of variation

Supplemental Table 10. Repeatability results for exploratory ADC metrics from PET/MRI.

| Metric                | Mean<br>% $\Delta$ | wCV  |
|-----------------------|--------------------|------|
| ADC <sub>mean</sub>   | -0.1%              | 3.4% |
| ADC <sub>20</sub>     | -0.3%              | 3.2% |
| ADC <sub>trough</sub> | 0.5%               | 3.8% |
| DTV                   | -2.7%              | 9.7% |

Note: For patients with more than one usable set of ADC data for a given session (as two DWI acquisitions were performed per session), one set was selected at random from each session for this analysis.

Abbreviations: ADC – apparent diffusion coefficient; ADC<sub>20</sub> – mean value obtained from the intra-lesion voxels with the lowest 20% of ADC values; ADC<sub>trough</sub> – lowest mean ADC value obtainable for a 1 cm<sup>3</sup> sphere placed within the confines of the lesion (analogous to the inverse of *peak* for PET imaging) ; DTV – diffusional tumor volume; wCV – within-subject coefficient of variation

Supplemental Table 11. Pairwise comparisons of repeatability for SUV<sub>max</sub>, SUL<sub>peak</sub>, and ADC<sub>median</sub>.

| Pair | Metric 1                               | Mean  %Δ | SD    | Metric 2                               | Mean  %Δ | SD    | <i>p</i> |
|------|----------------------------------------|----------|-------|----------------------------------------|----------|-------|----------|
| 1    | SUV <sub>max</sub> OSEM 1 min PET/CT   | 9.4%     | 7.6%  | SUV <sub>max</sub> OSEM 1 min PET/MRI  | 8.0%     | 9.2%  | 0.64     |
| 2    | SUL <sub>peak</sub> OSEM 1 min PET/CT  | 11.0%    | 8.2%  | SUL <sub>peak</sub> OSEM 1 min PET/MRI | 10.2%    | 11.2% | 0.40     |
| 3    | SUV <sub>max</sub> OSEM 3 min PET/CT   | 9.9%     | 8.9%  | SUV <sub>max</sub> OSEM 3 min PET/MRI  | 6.5%     | 8.3%  | 0.22     |
| 4    | SUL <sub>peak</sub> OSEM 3 min PET/CT  | 10.8%    | 9.9%  | SUL <sub>peak</sub> OSEM 3 min PET/MRI | 8.5%     | 10.7% | 0.14     |
| 5    | SUV <sub>max</sub> OSEM 5 min PET/CT   | 9.7%     | 9.6%  | SUV <sub>max</sub> OSEM 5 min PET/MRI  | 7.7%     | 9.7%  | 0.73     |
| 6    | SUL <sub>peak</sub> OSEM 5 min PET/CT  | 10.4%    | 10.6% | SUL <sub>peak</sub> OSEM 5 min PET/MRI | 8.2%     | 11.9% | 0.16     |
| 7    | SUV <sub>max</sub> PSF 1 min PET/CT    | 15.9%    | 7.6%  | SUV <sub>max</sub> PSF 1 min PET/MRI   | 9.7%     | 7.5%  | 0.08     |
| 8    | SUL <sub>peak</sub> PSF 1 min PET/CT   | 12.6%    | 9.3%  | SUL <sub>peak</sub> PSF 1 min PET/MRI  | 12.1%    | 10.4% | 0.93     |
| 9    | SUV <sub>max</sub> PSF 3 min PET/CT    | 12.5%    | 10.5% | SUV <sub>max</sub> PSF 3 min PET/MRI   | 7.1%     | 6.0%  | 0.12     |
| 10   | SUL <sub>peak</sub> PSF 3 min PET/CT   | 12.3%    | 10.4% | SUL <sub>peak</sub> PSF 3 min PET/MRI  | 9.0%     | 12.3% | 0.36     |
| 11   | SUV <sub>max</sub> PSF 5 min PET/CT    | 8.9%     | 8.5%  | SUV <sub>max</sub> PSF 5 min PET/MRI   | 8.4%     | 7.6%  | 0.87     |
| 12   | SUL <sub>peak</sub> PSF 5 min PET/CT   | 10.5%    | 9.9%  | SUL <sub>peak</sub> PSF 5 min PET/MRI  | 8.8%     | 11.4% | 0.25     |
| 13   | SUV <sub>max</sub> PSF 3 min PET/MRI   | 7.1%     | 6.0%  | ADC <sub>median</sub>                  | 3.9%     | 2.7%  | 0.23     |
| 14   | SUL <sub>peak</sub> PSF 3 min PET/MRI  | 9.0%     | 12.3% | ADC <sub>median</sub>                  | 3.9%     | 2.7%  | 0.74     |
| 15   | SUV <sub>max</sub> OSEM 3 min PET/MRI  | 6.5%     | 8.3%  | ADC <sub>median</sub>                  | 3.9%     | 2.7%  | 0.90     |
| 16   | SUL <sub>peak</sub> OSEM 3 min PET/MRI | 8.5%     | 10.7% | ADC <sub>median</sub>                  | 3.9%     | 2.7%  | 0.41     |

Note: All data are based on whole tumor contours. Numbers in the mean |%Δ| column are means (across all subjects) of the *absolute values* of relative differences (i.e., percentage changes) between imaging sessions 1 and 2. The *p* values are based on results of the Wilcoxon signed-rank test for comparisons 1-12 (paired data) and the Mann-Whitney *U* test for comparisons 13-16 (unpaired data).

Abbreviations: ADC – apparent diffusion coefficient; OSEM – ordered-subset expectation maximization; PSF – point-spread function; SD – standard deviation

Supplemental Table 12. Pairwise comparisons of repeatability for exploratory <sup>18</sup>F-FDG-PET and ADC metrics.

| Pair | Metric 1                                  | Mean  %Δ | SD    | Metric 2                                   | Mean  %Δ | SD    | <i>p</i> |
|------|-------------------------------------------|----------|-------|--------------------------------------------|----------|-------|----------|
| 1    | Volume PET/CT                             | 15.4%    | 13.0% | Volume PET/MRI                             | 8.5%     | 10.1% | 0.11     |
| 2    | SUV <sub>mean</sub> PSF 1 min PET/CT      | 15.6%    | 10.7% | SUV <sub>mean</sub> PSF 1 min PET/MRI      | 15.2%    | 13.1% | 0.73     |
| 3    | 40% SUV <sub>mean</sub> PSF 1 min PET/CT  | 14.2%    | 8.4%  | 40% SUV <sub>mean</sub> PSF 1 min PET/MRI  | 9.9%     | 6.5%  | 0.16     |
| 4    | SUV <sub>mean</sub> PSF 3 min PET/CT      | 16.5%    | 12.1% | SUV <sub>mean</sub> PSF 3 min PET/MRI      | 12.1%    | 12.4% | 0.18     |
| 5    | 40% SUV <sub>mean</sub> PSF 3 min PET/CT  | 10.9%    | 9.8%  | 40% SUV <sub>mean</sub> PSF 3 min PET/MRI  | 7.6%     | 7.9%  | 0.16     |
| 6    | SUV <sub>mean</sub> PSF 5 min PET/CT      | 15.1%    | 10.9% | SUV <sub>mean</sub> PSF 5 min PET/MRI      | 11.8%    | 11.7% | 0.22     |
| 7    | 40% SUV <sub>mean</sub> PSF 5 min PET/CT  | 8.8%     | 9.0%  | 40% SUV <sub>mean</sub> PSF 5 min PET/MRI  | 9.0%     | 8.9%  | 0.87     |
| 8    | SUV <sub>mean</sub> OSEM 1 min PET/CT     | 13.8%    | 10.0% | SUV <sub>mean</sub> OSEM 1 min PET/MRI     | 11.3%    | 11.5% | 0.36     |
| 9    | 40% SUV <sub>mean</sub> OSEM 1 min PET/CT | 9.0%     | 7.0%  | 40% SUV <sub>mean</sub> OSEM 1 min PET/MRI | 7.8%     | 9.4%  | 0.47     |
| 10   | SUV <sub>mean</sub> OSEM 3 min PET/CT     | 14.8%    | 10.8% | SUV <sub>mean</sub> OSEM 3 min PET/MRI     | 11.4%    | 10.8% | 0.25     |
| 11   | 40% SUV <sub>mean</sub> OSEM 3 min PET/CT | 9.4%     | 9.6%  | 40% SUV <sub>mean</sub> OSEM 3 min PET/MRI | 7.5%     | 9.3%  | 0.33     |
| 12   | SUV <sub>mean</sub> OSEM 5 min PET/CT     | 14.4%    | 10.7% | SUV <sub>mean</sub> OSEM 5 min PET/MRI     | 10.3%    | 12.1% | 0.12     |
| 13   | 40% SUV <sub>mean</sub> OSEM 5 min PET/CT | 10.3%    | 10.2% | 40% SUV <sub>mean</sub> OSEM 5 min PET/MRI | 7.3%     | 9.8%  | 0.26     |
| 14   | ADC <sub>mean</sub> (inter-session)       | 3.1%     | 2.1%  | ADC <sub>mean</sub> (intra-session)        | 2.7%     | 1.9%  | 0.35     |
| 15   | ADC <sub>mean</sub> (inter-session)       | 3.1%     | 2.1%  | ADC <sub>median</sub> (inter-session)      | 3.9%     | 2.7%  | 0.90     |
| 16   | ADC <sub>mean</sub> (inter-session)       | 3.1%     | 2.1%  | ADC <sub>20</sub> (inter-session)          | 2.9%     | 3.4%  | 0.22     |
| 17   | ADC <sub>mean</sub> (inter-session)       | 3.1%     | 2.1%  | ADC <sub>trough</sub> (inter-session)      | 3.9%     | 3.6%  | 0.75     |
| 18   | SUV <sub>max</sub> PSF 3 min PET/MRI      | 7.1%     | 6.0%  | ADC <sub>mean</sub> (inter-session)        | 3.1%     | 2.1%  | 0.17     |
| 19   | SUL <sub>peak</sub> PSF 3 min PET/MRI     | 9.0%     | 12.3% | ADC <sub>mean</sub> (inter-session)        | 3.1%     | 2.1%  | 0.70     |
| 20   | SUV <sub>max</sub> OSEM 3 min PET/MRI     | 6.5%     | 8.3%  | ADC <sub>mean</sub> (inter-session)        | 3.1%     | 2.1%  | 0.96     |
| 21   | SUL <sub>peak</sub> OSEM 3 min PET/MRI    | 8.5%     | 10.7% | ADC <sub>mean</sub> (inter-session)        | 3.1%     | 2.1%  | 0.50     |
| 22   | SUV <sub>mean</sub> PSF 3 min PET/CT      | 16.5%    | 12.1% | 40% SUV <sub>mean</sub> PSF 3 min PET/CT   | 10.9%    | 9.8%  | 0.02     |
| 23   | SUV <sub>mean</sub> PSF 3 min PET/MRI     | 12.1%    | 12.4% | 40% SUV <sub>mean</sub> PSF 3 min PET/MRI  | 7.6%     | 7.9%  | 0.06     |

Note: Data are based on whole tumor contours except for metrics preceded by a '40%' designation; these metrics are based on the 40% isocontour. Numbers provided in the mean |%Δ| column are means (across all subjects) of the *absolute values* of relative differences (i.e., percentage changes) between imaging sessions 1 and 2. The *p* values are based on results of the Wilcoxon signed-rank test for comparisons 1-17 & 22-23 (paired data) and the Mann-Whitney *U* test for comparisons 18-21 (unpaired data).

Abbreviations: 40% – 40% isocontour; ADC – apparent diffusion coefficient; OSEM – ordered-subset expectation maximization; PSF – point-spread function; WT – whole tumor
